# Supplementary material
Source: publisher figshare collection journal article supplement (https://asha.figshare.com/articles/dataset/_/14219771)
Supplement: Supplementary file 2 [file 1]

### **Supplemental Material S5. Home practice.**

To increase dose of strategy practice and facilitate use in everyday conversations, all participants engaged in home practice involving two activities. The first activity involved spoken naming practice of treated items using the picture stimuli and self-cue cards, with participants encouraged to complete this a minimum of 30 minutes, twice a week. The second activity required participants to use the self-cueing strategy while engaged in a conversation with their communication partner, reinforcing the transfer of strategies in interactions outside the intervention context, and further facilitating opportunity for strategy use with any vocabulary. Conversation practice was encouraged a minimum of 30 minutes each day of a week. Participants or communication partners were asked to record all occasions of practice, including documentation of the words practiced and conversation topics.
