# Supplementary material
Source: publisher figshare collection journal article supplement (https://asha.figshare.com/articles/dataset/_/14219771)
Supplement: Supplementary file 3 [file 1]

**Supplemental Material S1.** Naming stimuli synonyms and psycholinguistic variables.

| #  | Noun          | Synonyms           | Frequency* | Imageability* | Age of acquisition* | Syllables* |
|----|---------------|--------------------|------------|---------------|---------------------|------------|
| 1  | Flowers       | -                  | 1161       | 618           | -                   | 2          |
| 2  | Plants        | -                  | 1408       | 605           | -                   | 1          |
| 3  | Herbs         | -                  | 254        | 502           | -                   | 1          |
| 4  | Lawnmower     | -                  | 24         | -             | -                   | 3          |
| 5  | Recipe        | -                  | 388        | -             | -                   | 3          |
| 6  | Barbecue      | -                  | 456        | -             | -                   | 3          |
| 7  | Blender       | -                  | 85         | -             | -                   | 2          |
| 8  | Microwave     | -                  | 199        | -             | -                   | 3          |
| 9  | Groceries     | -                  | 301        | -             | -                   | 2          |
| 10 | Butcher       | Deli, Delicatessen | 434        | 596           | -                   | 2          |
| 11 | Bakery        | -                  | 179        | -             | -                   | 1          |
| 12 | Pharmacy      | Chemist            | 175        | -             | -                   | 3          |
| 13 | Passport      | -                  | 534        | 546           | -                   | 2          |
| 14 | Plane         | -                  | 4872       | 556           | -                   | 1          |
| 15 | Museum        | -                  | 942        | -             | -                   | 3          |
| 16 | Tourist       | -                  | 237        | 577           | -                   | 2          |
| 17 | Computer      | -                  | 3011       | -             | -                   | 3          |
| 18 | Internet      | -                  | 334        | -             | -                   | 3          |
| 19 | Camera        | -                  | 3011       | 576           | -                   | 2          |
| 20 | Charger       | -                  | 62         | -             | -                   | 2          |
| 21 | Library       | -                  | 1170       | 587           | -                   | 2          |
| 22 | Playground    | -                  | 260        | -             | -                   | 2          |
| 23 | Festival      | Fete, Fair         | 505        | -             | -                   | 3          |
| 24 | Restaurant    | -                  | 2373       | 611           | -                   | 3          |
| 25 | Birthday      | -                  | 4958       | -             | -                   | 2          |
| 26 | Camping       | -                  | 315        | -             | -                   | 2          |
| 27 | Pets          | -                  | 290        | 589           | 219                 | 1          |
| 28 | Grandchildren | Grandparents       | 198        | -             | -                   | 3          |
| 29 | Kitchen       | -                  | 2974       | 559           | -                   | 2          |
| 30 | Laundry       | -                  | 972        | -             | 367                 | 2          |
| 31 | Calendar      | -                  | 363        | -             | -                   | 3          |
| 32 | List          | -                  | 4110       | -             | -                   | 1          |
| 33 | Cricket bat   | -                  | 144        | 586           | -                   | 3          |
| 34 | Stadium       | -                  | 312        | 586           | -                   | 3          |
| 35 | Team          | -                  | 7528       | 565           | -                   | 1          |
| 36 | Supporters    | Fans               | 53         | -             | -                   | 3          |
| 37 | Storm         | -                  | 1574       | 587           | -                   | 1          |
| 38 | Rainbow       | -                  | 407        | 604           | -                   | 2          |
| 39 | Lake          | River              | 1836       | 616           | -                   | 1          |
| 40 | Flood         | -                  | 291        | 598           | -                   | 1          |
| 41 | Racquets      | -                  | 3          | 522           | -                   | 2          |
| 42 | Gym           | -                  | 927        | 613           | -                   | 1          |
| 43 | Bike          | -                  | 1320       | -             | -                   | 1          |
| 44 | Sunscreen     | -                  | 51         | -             | -                   | 2          |
| 45 | Stereo        | -                  | 304        | -             | -                   | 3          |
| 46 | Orchestra     | -                  | 281        | 619           | -                   | 3          |
| 47 | Guitar        | -                  | 795        | -             | -                   | 2          |
| 48 | Concert       | -                  | 895        | 578           | 386                 | 2          |

| #  | Verb         | Synonyms          | Frequency* | Imageability* | Age of acquisition* | Syllables* |
|----|--------------|-------------------|------------|---------------|---------------------|------------|
| 1  | Growing      | -                 | 1527       | 371           | -                   | 2          |
| 2  | Watering     | -                 | 109        | 632           | 153                 | 3          |
| 3  | Pruning      | -                 | 25         | 578           | 347                 | 2          |
| 4  | Fertilising  | -                 | 5          | -             | -                   | 4          |
| 5  | Measuring    | -                 | 126        | 379           | 344                 | 3          |
| 6  | Pouring      | -                 | 302        | 495           | -                   | 2          |
| 7  | Tasting      | -                 | 94         | 425           | -                   | 2          |
| 8  | Cutting      | Slicing, Chopping | 1126       | 460           | -                   | 2          |
| 9  | Deciding     | -                 | 167        | -             | -                   | 3          |
| 10 | Buying       | Purchasing        | 1679       | 397           | -                   | 2          |
| 11 | Ordering     | -                 | 369        | 352           | 344                 | 2          |
| 12 | Browsing     | Looking           | 52         | -             | -                   | 2          |
| 13 | Exploring    | -                 | 139        | -             | -                   | 3          |
| 14 | Relaxing     | -                 | 184        | 387           | -                   | 3          |
| 15 | Packing      | -                 | 698        | -             | -                   | 2          |
| 16 | Negotiating  | Bartering         | 155        | -             | -                   | 5          |
| 17 | Typing       | -                 | 165        | 395           | 383                 | 2          |
| 18 | Navigating   | -                 | 14         | -             | -                   | 4          |
| 19 | Calling      | -                 | 6311       | 424           | 225                 | 2          |
| 20 | Messaging    | -                 | 9          | 438           | -                   | 3          |
| 21 | Volunteering | -                 | 98         | -             | -                   | 4          |
| 22 | Teaching     | -                 | 1010       | 429           | -                   | 2          |
| 23 | Socialising  | -                 | 3          | -             | -                   | 4          |
| 24 | Coaching     | -                 | 163        | 560           | 314                 | 2          |
| 25 | Helping      | -                 | 2588       | 464           | 222                 | 2          |
| 26 | Sharing      | -                 | 623        | -             | -                   | 2          |
| 27 | Laughing     | -                 | 2667       | 528           | -                   | 2          |
| 28 | Hugging      | -                 | 146        | -             | -                   | 2          |
| 29 | Washing      | -                 | 462        | 522           | 186                 | 2          |
| 30 | Cleaning     | -                 | 1157       | 454           | -                   | 2          |
| 31 | Multitasking | -                 | 10         | -             | -                   | 4          |
| 32 | Recycling    | -                 | 80         | -             | -                   | 3          |
| 33 | Cheering     | -                 | 690        | -             | -                   | 2          |
| 34 | Handballing  | -                 | 28         | -             | -                   | 3          |
| 35 | Dribbling    | Bouncing          | 31         | -             | -                   | 2          |
| 36 | Fishing      | -                 | 1204       | 615           | -                   | 2          |
| 37 | Snowing      | -                 | 152        | 597           | -                   | 2          |
| 38 | Sweating     | -                 | 419        | 560           | -                   | 2          |
| 39 | Raining      | -                 | 499        | 618           | 211                 | 2          |
| 40 | Polluting    | Contaminating     | 23         | -             | -                   | 3          |
| 41 | Exercising   | -                 | 84         | -             | -                   | 4          |
| 42 | Swimming     | -                 | 1019       | 635           | 256                 | 2          |
| 43 | Meditating   | -                 | 34         | -             | -                   | 4          |
| 44 | Hiking       | -                 | 135        | -             | -                   | 2          |
| 45 | Singing      | -                 | 2281       | 471           | -                   | 2          |
| 46 | Busking      | -                 | 1          | -             | -                   | 2          |
| 47 | Drumming     | -                 | 57         | -             | -                   | 2          |
| 48 | Listening    | -                 | 3205       | -             | -                   | 3          |

| #  | Adjective     | Synonyms   | Frequency* | Imageability* | Age of acquisition* | Syllables* |
|----|---------------|------------|------------|---------------|---------------------|------------|
| 1  | Unhealthy     | -          | 83         | -             | -                   | 3          |
| 2  | Dirty         | -          | 3389       | 485           | -                   | 2          |
| 3  | Unripe        | -          | 2          | 490           | -                   | 2          |
| 4  | Peaceful      | Tranquil   | 573        | 426           | -                   | 2          |
| 5  | Sweet         | -          | 7405       | 493           | -                   | 1          |
| 6  | Spicy         | -          | 169        | 494           | -                   | 2          |
| 7  | Burnt         | -          | 488        | -             | -                   | 1          |
| 8  | Refreshing    | -          | 187        | 374           | -                   | 3          |
| 9  | Poor          | -          | 6583       | 447           | -                   | 1          |
| 10 | Antique       | -          | 309        | 549           | 439                 | 2          |
| 11 | Busy          | -          | 5433       | 403           | -                   | 2          |
| 12 | Impatient     | -          | 206        | -             | -                   | 3          |
| 13 | Excited       | -          | 2479       | -             | -                   | 3          |
| 14 | Frightened    | Scared     | 1186       | -             | -                   | 2          |
| 15 | Multicultural | -          | 3          | -             | -                   | 4          |
| 16 | Exhausted     | Tired      | 655        | 520           | -                   | 2          |
| 17 | Frustrated    | -          | 255        | 381           | -                   | 3          |
| 18 | Broken        | -          | 3634       | 469           | -                   | 2          |
| 19 | Confused      | Unsure     | 1653       | -             | -                   | 2          |
| 20 | Entertaining  | -          | 288        | 435           | -                   | 4          |
| 21 | Courageous    | -          | 161        | -             | -                   | 3          |
| 22 | Friendly      | -          | 1328       | 439           | -                   | 2          |
| 23 | Dangerous     | -          | 3817       | -             | -                   | 3          |
| 24 | Powerful      | -          | 1791       | -             | -                   | 3          |
| 25 | Loud          | Noisy      | 2031       | 448           | -                   | 1          |
| 26 | Playful       | -          | 59         | 463           | -                   | 2          |
| 27 | Caring        | -          | 359        | -             | -                   | 2          |
| 28 | Affectionate  | -          | 115        | 471           | -                   | 4          |
| 29 | Lazy          | -          | 591        | 464           | -                   | 2          |
| 30 | Chaotic       | -          | 57         | 434           | -                   | 3          |
| 31 | Heavy         | -          | 2412       | 495           | -                   | 2          |
| 32 | Overwhelmed   | Stressed   | 201        | -             | -                   | 3          |
| 33 | Exhausted     | Tired      | 655        | 434           | -                   | 3          |
| 34 | Proud         | -          | 4265       | -             | -                   | 1          |
| 35 | Competitive   | Aggressive | 214        | -             | -                   | 4          |
| 36 | Obsessed      | Dedicated  | 526        | -             | -                   | 2          |
| 37 | Itchy         | -          | 116        | -             | -                   | 2          |
| 38 | Freezing      | Cold       | 680        | -             | -                   | 2          |
| 39 | Overcast      | Cloudy     | 24         | -             | -                   | 3          |
| 40 | Mountainous   | -          | 8          | -             | -                   | 3          |
| 41 | Healthy       | Fit        | 1262       | -             | -                   | 2          |
| 42 | Strong        | -          | 4430       | 463           | -                   | 1          |
| 43 | Flexible      | -          | 136        | -             | -                   | 3          |
| 44 | Challenging   | Difficult  | 194        | -             | -                   | 3          |
| 45 | Classical     | -          | 224        | -             | -                   | 3          |
| 46 | Famous        | Talented   | 2296       | 376           | -                   | 2          |
| 47 | Acoustic      | Live       | 49         | -             | -                   | 3          |
| 48 | Joyful        | Happy      | 76         | 473           | -                   | 2          |

\*Frequency counts from SUBTLEX-US <http://www.lexique.org/shiny/openlexicon/>, imageability, age of acquisition and syllable counts from MRC Psycholinguistic Database <https://websites.psychology.uwa.edu.au/school/MRCDatabase/scripts/ccmrc.exe>
