# Supplementary material
Source: publisher figshare collection journal article supplement (https://asha.figshare.com/articles/dataset/_/14219771)
Supplement: Supplementary file 4 [file 1]

#### Supplemental Material S4. Cognitive scaffolds implemented in intervention.

| Cognitive function                      | Scaffolds                                                                                                                                                                                                                                                                                                                                                                                                                                                   |
|-----------------------------------------|-------------------------------------------------------------------------------------------------------------------------------------------------------------------------------------------------------------------------------------------------------------------------------------------------------------------------------------------------------------------------------------------------------------------------------------------------------------|
| Executive function and visual attention | <ul style="list-style-type: none"> <li>• Explicit prompts to focus on use of the self-cueing strategy (i.e., increase focused attention to strategy use rather than error)</li> <li>• Explicit prompts to detect onset of word finding difficulty or error production (i.e., increase focused attention to communicative output)</li> <li>• Tasks completed in isolation, with breaks between task change (i.e., reduce impact of task shifting)</li> </ul> |
| Working memory                          | <ul style="list-style-type: none"> <li>• Instructions delivered in short phrases / units of information (i.e., minimize length of information)</li> <li>• Instructions delivered once the participant has completed each step in the task (i.e., minimize demand on temporary storage)</li> <li>• Orthographic aids to support auditory information (i.e., minimize demand on temporary storage)</li> </ul>                                                 |
| Verbal episodic memory                  | <ul style="list-style-type: none"> <li>• Increased spacing of self-cue probe "when you cannot think of a word what should you do?" (i.e., spaced retrieval principles)</li> <li>• Minimum of 10 exposures to the self-cue strategy each session (i.e., draw on implicit memory)</li> <li>• Visual aids to support task auditory information (i.e., draw on other modalities to support information processing)</li> </ul>                                   |
| Visual recognition memory               | <ul style="list-style-type: none"> <li>• Expose participant to one self-cue support card at a time and increase to multiple cards as able (i.e., minimize demand on processing visual stimuli)</li> <li>• Expose participant to one picture for treated items at a time and increase to multiple pictures as able (i.e., minimize demand on processing visual stimuli)</li> </ul>                                                                           |
| Autobiographical memory                 | <ul style="list-style-type: none"> <li>• A self-cue support card for all participants to elicit personal experiences (i.e., draw on personal associations with treated items)</li> <li>• Inclusion of personal stimuli (e.g., photographs) in phase 3 (communication partner prompted self-cueing) to elicit meaningful discourse</li> </ul>                                                                                                                |
