# Supplementary material
Source: publisher figshare collection journal article supplement (https://asha.figshare.com/articles/dataset/_/14219771)
Supplement: Supplementary file 5 [file 1]

**Supplemental Material S8.** Performance means for cognitive control measures by diagnostic group and assessment time.

| Cognitive control      | Time         | svPPA  | lvPPA  | AD     |
|------------------------|--------------|--------|--------|--------|
| ACE-III                | Baseline     | 51.958 | 63.542 | 41.292 |
|                        | Initial-post | 53.708 | 61.292 | 42.042 |
| Verbal episodic memory | Baseline     | 3.860  | 3.750  | 1.750  |
|                        | Initial-post | 4.271  | 4.673  | 2.035  |
| Visual memory          | Baseline     | 8.535  | 7.424  | 6.965  |
|                        | Initial-post | 6.785  | 8.174  | 6.465  |
