# Supplementary material
Source: publisher figshare collection journal article supplement (https://asha.figshare.com/articles/dataset/_/14219771)
Supplement: Supplementary file 7 [file 1]

## **Supplemental Material S7. Statistical support for aggregated baseline naming data.**

### **All word classes**

In assessing variation across the baseline period, the 3-way Condition (treated, untreated)  $\times$  Diagnosis (svPPA, lvPPA, A)  $\times$  Baseline Assessment (baseline 1, baseline 2, baseline 3) interaction was not significant ( $F[4,48] = 1.766, p = .151$ ), and neither was the 2-way Condition  $\times$  Baseline Assessment interaction ( $F[2,48] = 0.921, p = .405$ ). The Diagnosis  $\times$  Baseline Assessment interaction was significant, but the simple main effects of Baseline Assessment for the three diagnostic groups were all non-significant (all  $ps > .05$ ).

### **Nouns**

There was a significant 3-way Condition  $\times$  Diagnosis  $\times$  Baseline Assessment interaction ( $F[4,48] = 4.894, p = .002$ ). In order to understand the 3-way interaction, the simple 2-way Diagnosis  $\times$  Baseline Assessment interactions were subsequently analyzed for each of the two conditions. For the untreated condition, the Diagnosis  $\times$  Baseline Assessment interaction was not significant ( $F[4,24] = 1.621, p = .202$ ), indicating that the non-significant Baseline Assessment component ( $F[2,24] = 1.299, p = .291$ ) could be generalized to all three diagnostic groups. There was, however, a significant Diagnosis  $\times$  Baseline Assessment interaction for the treated condition ( $F[4,24] = 15.541, p < .001$ ). The source of this interaction could be traced to a significant improvement in performance from baseline 1 to baseline 2 for the lvPPA diagnostic group ( $t[24] = 8.083, p < .001$ ). Although the improvement was statistically significant, it only represented a relatively small increase (Cohen's  $d = .28$ ), such that an aggregated baseline for nouns was used.

### **Verbs**

The 3-way Condition  $\times$  Diagnosis  $\times$  Baseline Assessment interaction was not significant ( $F[4,48] = 2.105, p = .095$ ), and neither was the 2-way Condition  $\times$  Baseline Assessment interaction ( $F[2,48] = 0.092, p = .912$ ). The Diagnosis  $\times$  Baseline Assessment interaction, however, was significant ( $F[4,48] = 4.242, p = .005$ ). The source of this interaction could be traced to a significant improvement in performance from baseline 1 to baseline 3 for the lvPPA diagnostic group ( $t[48] = 3.266, p = .002$ ). Although the improvement was statistically significant, it only represented a relatively small increase (Cohen's  $d = .24$ ), supporting the use of an aggregated baseline for verbs.

### **Adjectives**

The 3-way Condition  $\times$  Diagnosis  $\times$  Baseline Assessment interaction was not significant ( $F[4,48] = 2.353, p = .067$ ), and neither was the 2-way Condition  $\times$  Baseline Assessment interaction ( $F[2,48] = 1.100, p = .341$ ) nor the 2-way Diagnosis  $\times$  Baseline Assessment interaction ( $F[4,48] = 0.825, p = .516$ ). Because Baseline Assessment did not interact with the other factors, its non-significant main effect ( $F[2,48] = 2.871, p = .066$ ) can be generalized across both conditions and all three diagnostic groups, rationalizing the use of an aggregated baseline for adjectives.
