# Supplementary material
Source: publisher figshare collection journal article supplement (https://asha.figshare.com/articles/dataset/_/14219771)
Supplement: Supplementary file 8 [file 1]

### Supplemental Material S3. Strategic self-cue cards.

#### Meaning

[OBJECTS/PLACES]

- Special feature – what is unique about it?
- Category – what group does it belong to?
- Visualise – what does it look like?
- Location – where is it found?
- Function – what do we use it for?
- Similar – what is it similar to?

#### Memory

[OBJECTS/PLACES]

- My memories – what is significant about this?
- Experiences – do you have one of these? Do you go to this place?
- Friends & family – do you know someone who has one of these? Do you know someone who goes here?

#### Meaning

[ACTIONS]

- Special feature – what is unique about it?
- Visualise – what does it look like?
- Location – where do we do this?
- Function – what do we need to do this?
- Similar – what is it similar to?
- Time – when do we do this?

#### Memory

[ACTIONS]

- My memories – what is significant about this?
- Experiences – is this something that you do? When do you do this?
- Friends & family – do you know someone who does this?

## Meaning

[DESCRIBING]

- Special feature – what is unique about it?
- Visualise – what does it look like?
- Context – when would this word be used?
- Similar – what is a word that means the same?
- Opposite – what is a word that means the opposite?

## Memory

[DESCRIBING]

- My memories – when do you use this word? What is the word associated with in your life?
- Experiences – describe when you last felt this way.
- Friends & family – does this word remind you of someone?

## Letters

[ALL WORDS]

- First letter – what letter does it start with?
- Writing – can you write the letter?
- Letter chart – can you find the letter?
- Read – read the written word.

## Sounds

[ALL WORDS]

- First sound – what sound does it start with?
- Other sounds – can you think of any sounds in the word?
- Repetition – repeat the word.
